# Supplementary material for: Urinary Metabolomic Profiling Analysis and Evaluation of the Effect of Ecklonia cava Extract Intake
Source: MDPI journal article supplement (doi:10.3390/nu12051407), 2020-05-14

**Supplementary Figure 1. Validation plot of the PLS-DA model using a permutation test**  
**the was randomly permuted 100 times, and the resulting R2 and Q2 values were plotted.**

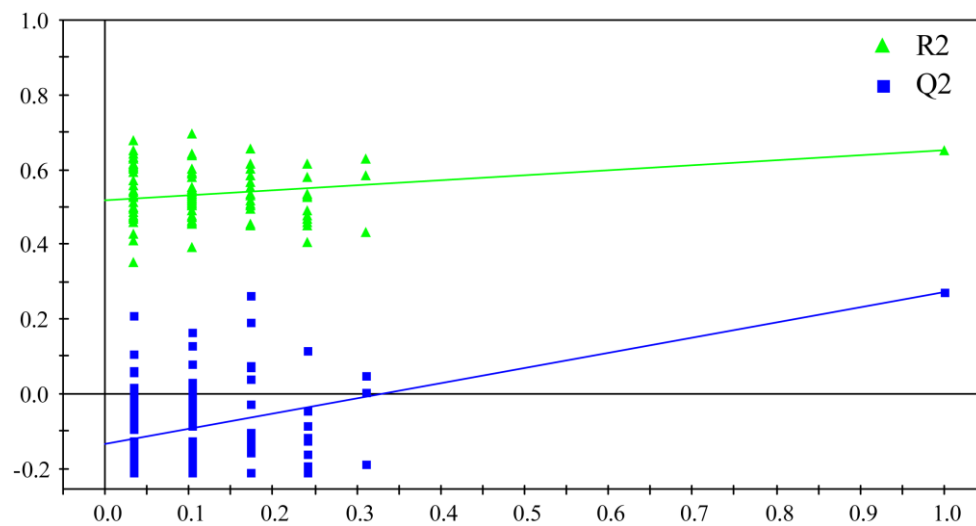

Supplement: s1 [file s1]
