# Supplementary material for: Urinary Metabolomic Profiling Analysis and Evaluation of the Effect of Ecklonia cava Extract Intake
Source: MDPI journal article supplement (doi:10.3390/nu12051407), 2020-05-14

**Supplementary Figure 2. The MS/MS spectra acquired from commercial standard compounds (A and C) and plasma samples (B and D). Riboflavin (A and B) and urocanic acid (C and D).**

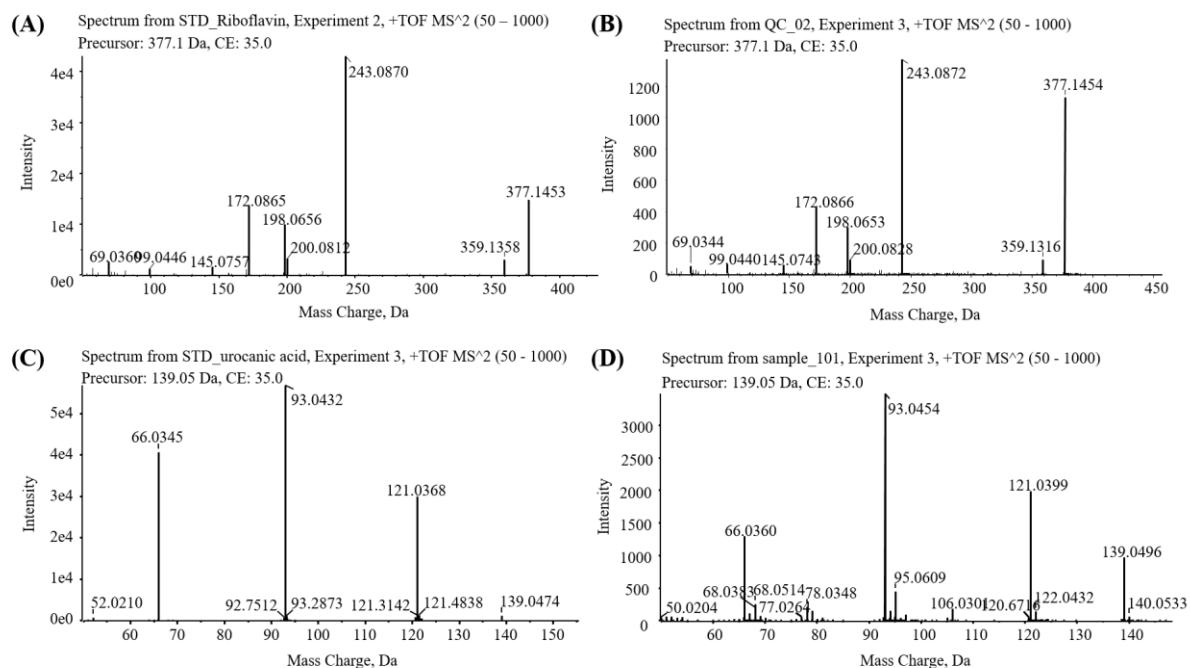

Supplement: s1 [file s1]
