# Supplementary material for: Urinary Metabolomic Profiling Analysis and Evaluation of the Effect of Ecklonia cava Extract Intake
Source: Nutrients. 2020 May 14;12(5):1407. doi: 10.3390/nu12051407 (PMC7285171; doi:10.3390/nu12051407)
Supplement: Supplementary file 1 [file nutrients-12-01407-s001.zip]

Archive with 4 entries (4 files):
- Supplementary Materials_nutrients/Supplementary Figure 1.pdf
- Supplementary Materials_nutrients/Supplementary Figure 2.pdf
- Supplementary Materials_nutrients/Supplementary Table S1.xlsx
- Supplementary Materials_nutrients/Supplementary Table S2.xlsx
