# Supplementary material for: Urinary Metabolomic Profiling Analysis and Evaluation of the Effect of Ecklonia cava Extract Intake
Source: Nutrients. 2020 May 14;12(5):1407. doi: 10.3390/nu12051407 (PMC7285171; doi:10.3390/nu12051407)
Supplement: Supplementary file 1 [file nutrients-12-01407-s001.zip › Supplementary Materials_nutrients/Supplementary Table S1.xlsx]

## Sheet: Sheet1
Supplementary Table S1. The selected metabolites in positive ionization mode.
	m/z	Ret. Time	P-value	CV	Identification	Note
388	116.069	1.37	0.021	9.9	Unknown
679	133.03	0.84	0.043	9.58	Unknown
698	134.06	5.43	0.034	6.63	Unknown
802	139.049	1.38	0.01	5.51	Unknown
803	139.049	0.84	0.004	4.3	Urocanic acid	Standard confirmation
973	148.003	0.59	0.007	13.13	Unknown
1262	160.106	1.55	0.025	12.41	Guanidino valeric acid	Putative identification
1585	174.613	12.53	0.044	17.07	Unknown
1705	180.086	1.98	0.014	6.88	Unknown
2234	203.055	8.18	0.035	9.56	Unknown
2789	230.16	1.34	0.014	9.24	Unknown
2791	230.185	1.6	0.001	8.38	Unknown
2906	236.147	0.76	0.041	12.17	Unknown
2924	237.148	13.02	0.041	7.57	Unknown
4153	290.14	11.77	0.021	10.3	Unknown
4165	290.196	6.91	0.039	11.15	Unknown
4580	304.143	13.99	0.009	6.87	Unknown
4704	309.056	1.45	0.046	11.3	Unknown
4883	315.195	9.23	0.03	9.79	Unknown
4925	316.24	12.65	0.049	8.68	Unknown
5072	323.002	3.99	0.042	6.01	Unknown
5462	340.102	4.88	0.039	5.13	5-Hydroxy-6-methoxyindole glucuronide	Putative identification
5463	340.102	7.12	0.037	3.39	Unknown
5594	345.151	10.02	0.049	6.9	Unknown
5920	362.083	7.12	0.035	7.58	Unknown
6001	367.136	12.5	0.039	15.93	Unknown
6003	367.139	12.2	0.022	8.28	Unknown
6038	369.116	7.57	0.012	15.22	Unknown
6109	372.164	12.59	0.022	11.99	Unknown
6193	377.147	7.21	0.027	16.57	Riboflavin	Standard confirmation
6305	384.184	12.8	0.01	4.52	Unknown
6561	399.129	7.21	0.025	17.45	Unknown
6791	415.214	17.09	0	9.93	Unknown
7102	437.195	17.09	0	9.44	Unknown
7324	453.168	17.09	0	10.74	Unknown
7461	464.245	16.59	0.012	15.58	Unknown
7570	473.261	17.1	0	6.46	Unknown
8260	551.24	11.12	0.024	11.44	Unknown
8381	569.331	13.99	0.007	11.58	Unknown
