# Supplementary material for: Urinary Metabolomic Profiling Analysis and Evaluation of the Effect of Ecklonia cava Extract Intake
Source: Nutrients. 2020 May 14;12(5):1407. doi: 10.3390/nu12051407 (PMC7285171; doi:10.3390/nu12051407)
Supplement: Supplementary file 1 [file nutrients-12-01407-s001.zip › Supplementary Materials_nutrients/Supplementary Table S2.xlsx]

## Sheet: Sheet1
Supplementary Table S2. The selected metabolites in negative ionization mode.
	m/z	Ret. Time	P-value	CV	Identification	Note
977	193.052	8.86	0.36	3.94	Unknown
1939	255.824	4.79	0.12	14.7	Unknown
1964	257.818	4.77	0.34	15.32	Unknown
2798	303.073	3.69	0.47	4.36	Unknown
3186	323.054	11.59	0.31	9.8	Unknown
3363	331.102	7.02	0.56	7.19	Unknown
3413	333.154	13.34	0.77	5.04	Unknown
3507	339.05	11.59	0.31	9.67	Unknown
3680	345.154	13.72	0.42	6.03	Unknown
3735	347.16	13.73	0.15	5.74	Unknown
4327	371.099	7.84	0.65	6.91	Unknown
4586	383.048	9.05	0.93	8.93	Unknown
5189	403.11	13.73	0.34	9.41	Unknown
5300	407.04	6.55	0.34	6.65	Unknown
8208	572.253	9.61	0.17	4.93	Unknown
